# Supplementary material for: Clinical diagnosis, treatment, and survival analysis of 61 cases of salivary duct carcinoma: a retrospective study
Source: PeerJ. 2025 Jul 4;13:e19626. doi: 10.7717/peerj.19626 (PMC12232932; doi:10.7717/peerj.19626)
Supplement: Supplemental Information 1 [file peerj-13-19626-s001.xlsx]

## Sheet: Sheet1
No	Gender	Age	Tumor location	AJCC Stage	Tumor Size	Lymph-vascular invasion	Perineural invasion	Surgical margin	Lymph node metastasis	Distant metastasis	Primary Tumor Surgery	Lymph node dissection	Radiotherapy	Chemotherapy	Other therapy	Recurrence	Follow-up (month)	Disease Free survival(Month)	Overall survival(Month)	Outcomes
1	Male	17	Left Parotid gland	II	2	No	No	Negative	-	No	Left Parotid superficial lobectomy	No	Yes	Yes		No	131	131	131	Disease-free survival
2	Male	33	Left Parotid gland	IVA	2.5	No	No	Negative	-	No	Left Parotid superficial lobectomy	No	Yes	No		Yes	39	22	36	Neoplastic death
3	Female	38	Right Parotid gland	IVA	2.2	No	Yes	Negative	1/12	No	Right total parotidectomy	Yes,Right	Yes	Yes		No	100	100	100	Disease-free survival
4	Male	42	Right submandibular gland	IVA	6.5	Yes	Yes	Positive	R:5/16；L:0/13	No	Radical resection of right submandibular gland	Yes,Bilateral	Yes	Yes	Neoadjuvant chemotherapy	No	31	31	31	Disease-free survival
5	Male	45	Right Parotid gland	II	3.5	No	Yes	Negative	-	No	Left Parotid superficial lobectomy	No	Yes	No		Yes	39	11	37	Neoplastic death
6	Male	46	Left Parotid gland	III	2.5	No	No	Negative	1/7	No	Left total parotidectomy	Yes,Left	Yes	Yes		Yes	81	68	79	Neoplastic death
7	Male	48	Right Parotid gland	III	5	No	No	Negative	-	No	Left Parotid superficial lobectomy	No	No	No		Yes	35	26	34	Non-neoplastic death
8	Male	49	Left Parotid gland	IVA	5	Yes	Yes	Negative	1/36	No	Left total parotidectomy	Yes,Left	Yes	No		Yes	21	16	18	Neoplastic death
9	Male	50	Left Parotid gland	IVA	4	No	Yes	Negative	-	No	Left total parotidectomy	No	Yes	No	HER-2 targeted therapy	Yes	75	59	71	With disease survival
10	Male	51	Left Parotid gland	IVA	2	Yes	Yes	Negative	1/12	No	Left total parotidectomy	Yes,Left	Yes	Yes		No	138	138	138	Disease-free survival
11	Male	52	Left Parotid gland	IVA	2.6	No	Yes	Negative	-	No	Left total parotidectomy	No	Yes	No		Yes	60	38	60	Neoplastic death
12	Male	53	Left Parotid gland	IVA	5.7	No	Yes	Negative	7/51	No	Left total parotidectomy	Yes,Left	Yes	No		Yes	66	49	63	Neoplastic death
13	Male	53	Left submandibular gland	IVB	8	Yes	Yes	Positive	13/13	No	Radical resection of left submandibular gland	Yes,Left	Yes	Yes		Yes	49	7	46	Neoplastic death
14	Male	54	Right Parotid gland	III	4.5	No	No	Negative	0/17	No	Right total parotidectomy	Yes,Right	Yes	Yes		No	44	44	44	Disease-free survival
15	Male	54	Right submandibular gland	IVB	6	Yes	Yes	Positive	20/21	No	Radical resection of right submandibular gland	Yes,Right	Yes	Yes		No	16	16	16	Disease-free survival
16	Female	55	Left Parotid gland	IVB	4.5	Yes	Yes	Positive	-	No	Left total parotidectomy	No	Yes	Yes	Vedicizumab	Yes	47	14	44	Neoplastic death
17	Male	55	Left submandibular gland	III	3	No	No	Negative	1/21	No	Radical resection of left submandibular gland	Yes,Left	Yes	Yes	HER-2 targeted therapy	Yes	63	42	61	With disease survival
18	Male	55	Left submandibular gland	II	3.5	No	No	Negative	0/9	No	Radical resection of left submandibular gland	Yes,Left	Yes	No		No	79	79	79	Disease-free survival
19	Female	55	Left Parotid gland	IVB	5	Yes	Yes	Positive	11011	No	Left total parotidectomy	Yes,Left	Yes	No	HER-2 targeted therapy	Yes	8	2	8	Neoplastic death
20	Male	56	Left Parotid gland	III	3	No	Yes	Negative	-	No	Left total parotidectomy	No	Yes	Yes		No	65	65	65	Disease-free survival
21	Male	57	Right submandibular gland	IVA	5	Yes	Yes	Negative	0/14	No	Radical resection of right submandibular gland	Yes,Right	Yes	No		Yes	20	12	16	Neoplastic death
22	Male	57	Right Parotid gland	IVA	3	No	No	Positive	-	No	Right Parotid superficial lobectomy	No	No	No		Yes	40	6	20	Neoplastic death
23	Male	57	Right submandibular gland	II	2.5	No	No	Negative	0/10	No	Radical resection of right submandibular gland	Yes,Right	Yes	No		No	63	63	63	Disease-free survival
24	Male	52	Right submandibular gland	IVC	2.5	-	-	-	Yes	Yes	No	Lymph node biopsy	Yes	Yes	ADT	-	11	0	11	With disease survival
25	Male	58	Right submandibular gland	IVB	4	Yes	Yes	Negative	34/38	No	Radical resection of right submandibular gland	Yes,Right	Yes	Yes	Radiotherapy had severe mucosal side effects and could not be tolerated. After 11 times, EGFR was positive and cetuximab was given	No	13	13	13	Disease-free survival
26	Male	58	Right Parotid gland	IVB	3	Yes	Yes	Positive	0/10	No	Right total parotidectomy	Yes,Right	Yes	Yes	HER-2 targeted therapy	Yes	33	6	28	Neoplastic death
27	Male	59	Right Parotid gland	IVA	5	Yes	Yes	Positive	-	No	Right total parotidectomy	No	Yes	No		No	65	61	61	Disease-free survival
28	Male	59	Left submandibular gland	IVA	4	No	No	Negative	6/10	No	Radical resection of left submandibular gland	Yes,Left	Yes	Yes		No	65	65	65	Disease-free survival
29	Male	59	Left Parotid gland	IVA	2.5	No	Yes	Negative	0/23	No	Left total parotidectomy	Yes,Left	Yes	No	Treatment of bone metastasis with ibandronate	Yes	74	65	74	Neoplastic death
30	Male	60	Left Parotid gland	IVB	4	Yes	Yes	Positive	41/43	No	Left total parotidectomy	Yes,Left	Yes	Yes		No	28	28	28	Disease-free survival
31	Male	60	Right submandibular gland	IVB	5	Yes	Yes	Positive	R 24/24；L 17/32	Yes	Radical resection of right submandibular gland	Yes,Bilateral	No	No		Yes	17	8	16	Neoplastic death
32	Male	60	Right Parotid gland	II	3	No	No	Negative	-	No	Right Parotid superficial lobectomy	No	Yes	No		Yes	119	119	119	Disease-free survival
33	Female	61	Left Parotid gland	I	1.5	No	No	Negative	-	No	Left Parotid superficial lobectomy	No	Yes	No	EGFR(40+),Nimotuzumab 6 times	No	62	62	62	Disease-free survival
34	Male	61	Left submandibular gland	IVA	3.5	No	No	Negative	4/17	No	Radical resection of left submandibular gland	Yes,Left	Yes	No		No	13	13	13	Disease-free survival
35	Male	62	Right Parotid gland	IVB	2.5	No	No	Negative	9/12	No	Right Parotid superficial lobectomy	Yes,Right	Yes	No	HER-2 targeted therapy	Yes	21	11	21	With disease survival
36	Male	62	Right Parotid gland	IVA	2.5	No	No	Positive	11/23	No	Right Parotid superficial lobectomy	Yes,Right	No	No		Yes	46	7	20	Neoplastic death
37	Male	63	Right Parotid gland	IVA	4.5	Yes	Yes	Negative	6/23	No	Right total parotidectomy	Yes,Right	Yes	No		Yes	37	25	33	Neoplastic death
38	Male	63	Right Parotid gland	III	4.5	No	No	Negative	-	No	Right Parotid superficial lobectomy	No	Yes	No		No	61	61	61	Disease-free survival
39	Male	63	Left submandibular gland	IVB	4.5	No	No	Negative	9/11	No	Radical resection of left submandibular gland	Yes,Left	Yes	No		Yes	11	6	11	With disease survival
40	Female	63	Left Parotid gland	IVA	2.5	No	Yes	Negative	5/17	No	Left Parotid superficial lobectomy	Yes,Left	Yes	No	HER-2 targeted therapy	Yes	28	17	28	With disease survival
41	Male	63	Right Parotid gland	III	5.5	No	No	Negative	-	No	Right total parotidectomy	No	Yes	Yes		No	23	23	23	Disease-free survival
42	Male	64	Right submandibular gland	IVA	7	No	No	Negative	6/22	No	Radical resection of right submandibular gland	Yes,Right	Yes	Yes		No	41	41	41	Disease-free survival
43	Male	64	Left Parotid gland	IVA	3.5	No	Yes	Negative	-	No	Left total parotidectomy	No	Yes	Yes		No	4	4	4	Disease-free survival
44	Male	64	Left Parotid gland	IVA	4	Yes	Yes	Negative	6/12	No	Left total parotidectomy	Yes,Left	Yes	No		No	64	64	64	Disease-free survival
45	Male	66	Left Parotid gland	IVA	3	No	Yes	Negative	4/23	No	Left total parotidectomy	Yes,Left	Yes	No		Yes	66	41	61	Neoplastic death
46	Male	66	Right Parotid gland	IVA	4.5	No	Yes	Positive	9/14	No	Right total parotidectomy	Yes,Right	Yes	Yes		Yes	80	61	78	Neoplastic death
47	Male	66	Left Parotid gland	IVA	2.5	No	No	Positive	3/21	No	Left Parotid superficial lobectomy	Yes,Left	No	No		Yes	25	10	20	Non-neoplastic death
48	Male	66	Right Parotid gland	IVA	3	No	No	Positive	6/24	No	Right Parotid superficial lobectomy	Yes,Right	No	No		Yes	28	9	20	Neoplastic death
49	Female	67	Sublingual gland	II	2.5	No	No	Negative	0/12	No	Radical resection of left sublingual gland	Yes,Left	Yes	No		Yes	80	78	78	Disease-free survival
50	Male	67	Left Parotid gland	IVA	4.5	Yes	Yes	Negative	9/31	No	Left total parotidectomy	Yes,Left	Yes	No		Yes	38	35	40	With disease survival
51	Male	69	Right Parotid gland	IVC	5.5	Yes	Yes	Positive	17/23	No	Right total parotidectomy	Yes,Right	Yes	Yes		Yes	17	3	17	Neoplastic death
52	Female	69	Left Parotid gland	IVA	3.5	No	No	Negative	-	No	Right Parotid superficial lobectomy	No	Yes	No		No	52	41	50	Disease-free survival
53	Male	71	Left Parotid gland	IVA	5	Yes	Yes	Positive	6/13	No	Left total parotidectomy	Yes,Left	Yes	Yes		Yes	85	72	83	Neoplastic death
54	Male	72	Right Parotid gland	IVA	3.5	No	No	Negative	4/27	No	Right Parotid superficial lobectomy	Yes,Right	Yes	No		Yes	60	39	54	Neoplastic death
55	Female	74	Left Parotid gland	IVA	4	Yes	Yes	Negative	7/23	No	Left total parotidectomy	Yes,Left	Yes	No		Yes	29	17	26	Neoplastic death
56	Male	74	Sublingual gland	IVC	3	-	-	-	Yes	Yes	No	Lymph node biopsy	Yes	Yes	ADT+HER-2 targeted therapy	-	14	0	14	With disease survival
57	Female	77	Left Parotid gland	III	3.5	No	No	Negative	-	No	Left Parotid superficial lobectomy	No	Yes	No		Yes	51	11	51	Neoplastic death
58	Male	78	Right Parotid gland	IVA	4.7	Yes	Yes	Negative	4/19	No	Right total parotidectomy	Yes,Right	Yes	Yes		No	64	64	64	Disease-free survival
59	Female	78	Left Parotid gland	I	2	No	No	Positive	-	No	Left Parotid superficial lobectomy	No	No	No		Yes	28	20	25	Non-neoplastic death
60	Male	79	Left Parotid gland	IVA	4	No	Yes	Negative	6/31	No	Left total parotidectomy	Yes,Left	Yes	No		Yes	37	25	37	Neoplastic death
61	Female	79	Right Parotid gland	II	3.3	No	No	Negative	-	No	Right total parotidectomy	No	Yes	No		No	27	27	27	Disease-free survival

## Sheet: Sheet2
No	Tumor origin	Her-2	AR	Ki-67	GATA3	AE1/AE3	GCDFP-15	P63	S-100	EMA	CD117	P53
1		-	+	0.2	+	+	NP	-	-			Mutated
2	Pleomorphic adenoma,malignant component contain SDC	1+	+	0.7	+	+	+	partially+	partially+	+	-
3		-	+	0.1	NP	+	NP	-	-	+
4		2+	+	0.8	-		+	-	-		-	Mutated
5		-	+	0.7	+	+	NP	-	partially+
6		-	+	0.7	+		-	partially+	-	+
7		-	-	0.75	+	+	NP	-	-
8		3+	+	0.65	+	+	partially+	-	-
9		-	-	0.8	NP	+	-	-	-	+		Mutated
10		1+	+	0.2	+		+
11	Pleomorphic adenoma,malignant component contain SDC	-	+	0.3	NP	+	-	partially+	-	partially+
12		NP	+	0.4	NP	+	+	-	partially+			Mutated
13		-	+	0.5	+	NP	-		-
14		3+	+	0.4	+	+	-	partially+	partially+	partially+		Mutated
15		-	+	0.8	+	+	partially+	-	-	+
16		2+	+	0.7	+	+	+	-	-		-
17		-	+	0.6	NP		NP	partially+			-	Mutated
18		-	+	0.4	NP	+	NP	-	-	partially+
19		3+	+	0.8	+	+	-	-	-
20		-	+	0.3	+	+	-	-	-			Mutated
21		1+	-	0.7	-		-
22		-	+	0.6	+	+	-		-	+
23		-	+	0.25	-		NP		-
24		-	+	0.6	+	+	+	-	-
25		NP	+	0.7	+	+	partially+		-	+		Mutated
26		-	+	0.8	+	+	NP	partially+			-	Mutated
27		2+	-	0.5	-		+	-	-	+		Mutated
28		NP	+	0.4	+	+	partially+	-
29		-	+	0.7	+	+	-		partially+
30		-	-	0.8	NP		+	-			-	Mutated
31		-	+	0.7	+	+	partially+	-	-
32	Pleomorphic adenoma,malignant component contain SDC	-	+	0.2	+	+	-		-
33	Pleomorphic adenoma,malignant component contain SDC	1+	+	0.3	+		+	-		+	-	Mutated
34		3+	+	0.8	NP	+	+	-	-	+	-
35	Pleomorphic adenoma,malignant component contain SDC	3+	+	0.6	-	+	+	partially+	partially+	+	partially+	Mutated
36		-	+	0.65	+	NP	-	-				Mutated
37		-	-	0.7	+	+	NP	-	-	+
38		1+	+	0.3	NP	+	-	-
39	Pleomorphic adenoma,malignant component contain SDC	3+	-	0.7	+	+	+			+	-	Mutated
40		2+	+	0.6	-	+	+	-	-	+		Mutated
41	Pleomorphic adenoma,malignant component contain SDC	-	+	0.3	+	+	+	partially+	partially+	+	partially+	Mutated
42		1+	+	0.8	+		NP	-	-	+		Mutated
43		-	+	0.8	+	+	partially+	-	-	-	-
44		3+	+	0.6	NP	+	+	-	-
45	Pleomorphic adenoma,malignant component contain SDC	1+	+	0.4	+	+	NP	-	-			Mutated
46	Pleomorphic adenoma,malignant component contain SDC	2+	+	0.3	-		+	-	-	+
47		3+	+	0.6	+	+	+	-	-	+
48		2+	+	0.7	+		+	partially+	-			Mutated
49		-	+	0.6	+	+	+	-	-
50	Pleomorphic adenoma,malignant component contain SDC	-	+	0.8	+	+	-	-	-	+		Mutated
51		-	+	0.85	+		+	-	-	partially+	-	Mutated
52		2+	+	0.6	NP	+	NP	-		+		Mutated
53	Pleomorphic adenoma,malignant component contain SDC	-	+	0.5	+	+	NP	-	-	+
54		1+	+	0.4	+	+	+	-	-	-	-	Mutated
55		-	+	0.5	-	+	+	-	-	+
56		3+	+	0.7	+	+	+		-	+
57		-	+	0.7	+	+	partially+
58		NP	+	0.3	+		partially+	partially+	partially+			Mutated
59		-	+	0.4	+	-	NP		-	partially+
60	Pleomorphic adenoma,malignant component contain SDC	-	+	0.6	-	NP	+	-
61		3+	+	0.5	+	-	-		partially+	partially+		Mutated
